# Supplementary material for: Etelcalcetide Versus Cinacalcet in Hemodialysis Patients in the United States: A Facility Calcimimetic Approach to Assess Real-World Effectiveness
Source: PubMed Central journal article supplement — Kidney Med. 2022 Apr 29;4(6):100475. doi: 10.1016/j.xkme.2022.100475 (PMC9142674; doi:10.1016/j.xkme.2022.100475), 2022-04-29
Supplement: mmc1.pdf [file mmc1.pdf]

Table S1

Patient and facility characteristics in US HD facilities that switched to Etelcalcetide-first vs. remained Cinacalcet-first

**A. Facility characteristics in US HD facilities that switched to Etelcalcetide-first vs. remained Cinacalcet-first**

| Characteristics                         | Remain Cinacalcet-first |           | Switch to Etelcalcetide-first |           |
|-----------------------------------------|-------------------------|-----------|-------------------------------|-----------|
|                                         | Period 1                | Period 2  | Period 1                      | Period 2  |
| N facilities                            | 34                      |           | 32                            |           |
| N patients                              | 1670                    | 2178      | 1924                          | 1847      |
| N patients using calcimimetics          | 536                     | 673       | 612                           | 793       |
| DO size (% LDO/MDO vs SDO/Ind)*         | 79%                     |           | 19%                           |           |
| Facility type (% hospital-based)*       | 9%                      |           | 31%                           |           |
| Facility location (% rural)*            | 24%                     |           | 6%                            |           |
| Facility size (N patients)              | 71 ± 36                 | 74 ± 35   | 70 ± 34                       | 67 ± 31   |
| Facility % Black race                   | 38 ± 32                 | 39 ± 33   | 30 ± 31                       | 30 ± 31   |
| Facility % calcimimetic use             | 29 ± 9                  | 27 ± 10   | 32 ± 16                       | 41 ± 18   |
| Facility % vitamin D use                | 81 ± 9                  | 79 ± 11   | 67 ± 15                       | 65 ± 16   |
| Facility % PB (calcium-based) use       | 55 ± 25                 | 52 ± 29   | 50 ± 22                       | 54 ± 23   |
| Facility % PB (non-cal-based) use       | 56 ± 13                 | 56 ± 14   | 53 ± 17                       | 53 ± 22   |
| Facility mean dialysate calcium (mEq/L) | 2.4 ± 0.1               | 2.5 ± 0.1 | 2.5 ± 0.1                     | 2.6 ± 0.1 |

Mean ± SD, median [IQR], or % shown; DO=dialysis organization, PB=phosphate binder; LDO/MDO=large/medium DOs with 10+ affiliated HD units; SDO=small DOs (<10 affiliated units); Ind=independent HD units.

**B. Patient characteristics in US HD facilities that switched to Etelcalcetide-first vs. remained Cinacalcet-first**

| Characteristics                                | Calcimimetic-using patients only |                  |                               |                  |
|------------------------------------------------|----------------------------------|------------------|-------------------------------|------------------|
|                                                | Remain Cinacalcet-first          |                  | Switch to Etelcalcetide-first |                  |
|                                                | Period 1                         | Period 2         | Period 1                      | Period 2         |
| N facilities                                   | 34                               |                  | 32                            |                  |
| N patients                                     | 536                              | 673              | 612                           | 793              |
| <b>Demographics</b>                            |                                  |                  |                               |                  |
| Age (y)                                        | 57 ± 14                          | 58 ± 14          | 61 ± 14                       | 63 ± 14          |
| Sex (% male)                                   | 54%                              | 56%              | 54%                           | 55%              |
| Race (% Black)                                 | 46%                              | 51%              | 41%                           | 38%              |
| Dialysis vintage (y)                           | 3.8<br>[1.6,6.7]                 | 4.5<br>[2.4,7.5] | 3.8<br>[1.6,6.4]              | 3.7<br>[1.9,7.3] |
| Body mass index (kg/m <sup>2</sup> )           | 30.2 ±<br>7.8                    | 29.8 ±<br>7.7    | 30.6 ±<br>8.0                 | 30.5 ±<br>7.8    |
| <b>Comorbidity history (%)</b>                 |                                  |                  |                               |                  |
| Coronary artery disease                        | 23%                              | 25%              | 18%                           | 23%              |
| Cerebrovascular disease                        | 8%                               | 7%               | 8%                            | 10%              |
| Heart failure                                  | 23%                              | 17%              | 22%                           | 25%              |
| Peripheral vascular disease                    | 18%                              | 14%              | 12%                           | 12%              |
| Hypertension                                   | 86%                              | 89%              | 73%                           | 81%              |
| Other cardiovascular disease                   | 18%                              | 14%              | 19%                           | 26%              |
| Cancer (non-skin)                              | 5%                               | 5%               | 4%                            | 5%               |
| Diabetes                                       | 62%                              | 64%              | 57%                           | 62%              |
| Gastrointestinal bleeding                      | 8%                               | 6%               | 6%                            | 8%               |
| Lung disease                                   | 7%                               | 5%               | 8%                            | 8%               |
| Neurologic disease                             | 11%                              | 9%               | 4%                            | 4%               |
| Psychiatric disorder                           | 29%                              | 30%              | 26%                           | 28%              |
| Recurrent cellulitis, gangrene                 | 11%                              | 10%              | 4%                            | 6%               |
| <b>Markers of nutrition &amp; inflammation</b> |                                  |                  |                               |                  |

|                            |               |               |               |               |
|----------------------------|---------------|---------------|---------------|---------------|
| Serum albumin (g/dL)       | 3.8 ± 0.3     | 3.9 ± 0.3     | 3.8 ± 0.3     | 3.8 ± 0.3     |
| Hemoglobin (g/dL)          | 10.9 ±<br>1.0 | 10.8 ±<br>1.0 | 10.6 ±<br>1.0 | 10.7 ±<br>1.1 |
| Serum potassium (mEq/L)    | 4.8 ± 0.5     | 4.9 ± 0.5     | 4.8 ± 0.5     | 4.7 ± 0.5     |
| <b>Dialysis treatments</b> |               |               |               |               |
| Catheter use (%)           | 8%            | 10%           | 19%           | 14%           |

Mean ± SD, median [IQR], or % shown

Table S2

MBD marker outcomes in Etelcalcetide-first vs. Cinacalcet-first US HD facilities: Approach 1 results by level of adjustment

|                            | Model 1               |        | Model 2              |        | Model 3              |       | Model 4              |       |
|----------------------------|-----------------------|--------|----------------------|--------|----------------------|-------|----------------------|-------|
|                            | Estimate (95% CI)     | p-val  | Estimate (95% CI)    | p-val  | Estimate (95% CI)    | p-val | Estimate (95% CI)    | p-val |
| <b>Continuous outcomes</b> |                       |        |                      |        |                      |       |                      |       |
| PTH (pg/mL)                | -237 (-301, -172)     | <0.001 | -140 (-220, -57)     | <0.001 | -115 (-196, -34)     | 0.005 | -119 (-221, -17)     | 0.02  |
| Serum Ca (mg/dL)           | -0.16 (-0.26, -0.05)  | 0.004  | -0.06 (-0.19, 0.07)  | 0.36   | -0.12 (-0.25, 0.01)  | 0.07  | -0.04 (-0.19, 0.12)  | 0.62  |
| Serum P (mg/dL)            | -0.29 (-0.46, -0.11)  | 0.001  | -0.33 (-0.56, -0.10) | 0.01   | -0.18 (-0.40, 0.04)  | 0.11  | -0.02 (-0.29, 0.26)  | 0.89  |
| <b>Binary outcomes</b>     |                       |        |                      |        |                      |       |                      |       |
| PTH >600 pg/mL             | -23.2% (-29.5, -16.9) | <0.001 | -13.2% (-21.1, -5.2) | 0.001  | -11.4% (-19.3, -3.5) | 0.005 | -10.3% (-20.4, -0.3) | 0.04  |
| Ca <8.4 mg/dL              | 6.5% (0.4, 12.6)      | 0.04   | 1.8% (-6.1, 9.6)     | 0.66   | 5.0% (-3.0, 13.0)    | 0.22  | -0.7% (-10.5, 9.2)   | 0.89  |
| P >5.5 mg/dL               | -7.4% (-12.5, -2.3)   | 0.004  | -5.9% (-12.9, 1.1)   | 0.10   | -1.1% (-8.0, 5.8)    | 0.76  | 4.4% (-4.2, 13.0)    | 0.31  |

Adjusted mean differences (95% CI) shown with progressive covariate adjustment; Continuous outcomes show mean difference in outcome labs (Etelcalcetide-first minus Cinacalcet-first); Binary outcomes show prevalence (%) difference in outcome labs being out of target (Etelcalcetide-first minus Cinacalcet-first). Linear mixed models with a random facility intercept were fit combining all facilities (Etelcalcetide-first and Cinacalcet-first) to estimate the mean difference. For the binary outcomes, these linear models are so-called "linear probability models". Progressive fixed effect adjustments were as follows:

Model 1: unadjusted

Model 2: Model 1 + facility-level characteristics (dialysis organization size, facility size, facility % Black race, hospital-based, facility % total calcimimetic use)

*Karaboyas et al, Kidney Med, "Etelcalcetide Versus Cinacalcet in Hemodialysis Patients in the United States: A Facility Calcimimetic Approach to Assess Real-World Effectiveness"*

Model 3 (Primary analysis): Model 2 + patient-level case-mix (age, sex, Black race, dialysis vintage, BMI, serum albumin, hemoglobin, serum potassium, 13 summary comorbidities, catheter use)

Model 4 (Possible mediators): Model 3 + facility-level MBD treatments (facility % vitamin D use, facility % phosphate binder [calcium-based] use, facility % phosphate binder [non-calcium-based] use, facility mean dialysate calcium)

Table S3

MBD marker outcomes in Etelcalcetide-first vs. Cinacalcet-first US HD facilities: Approach 1 results stratified by dialysis organization size

|                             | Small and independent dialysis organizations |                                |                              |         | Large and medium dialysis organizations |                                |                              |         |
|-----------------------------|----------------------------------------------|--------------------------------|------------------------------|---------|-----------------------------------------|--------------------------------|------------------------------|---------|
|                             | Etelcalcetide-first HD facilities            | Cinacalcet-first HD facilities | Adjusted difference (95% CI) | p-value | Etelcalcetide-first HD facilities       | Cinacalcet-first HD facilities | Adjusted difference (95% CI) | p-value |
| <b>N facilities</b>         | 38                                           | 23                             | --                           | --      | 7                                       | 44                             | --                           | --      |
| <b>N calcimimetic users</b> | 838                                          | 266                            | --                           | --      | 131                                     | 921                            | --                           | --      |
| <b>Continuous outcomes</b>  |                                              |                                |                              |         |                                         |                                |                              |         |
| PTH (pg/mL)                 | 462 ± 351                                    | 684 ± 588                      | -142 (-266, -17)             | 0.03    | 589 ± 432                               | 725 ± 557                      | -121 (-250, 8)               | 0.07    |
| Serum Ca (mg/dL)            | 8.9 ± 0.6                                    | 9.2 ± 0.7                      | -0.16 (-0.36, 0.04)          | 0.12    | 9.0 ± 0.7                               | 9.0 ± 0.5                      | -0.05 (-0.21, 0.10)          | 0.52    |
| Serum P (mg/dL)             | 5.5 ± 1.4                                    | 5.9 ± 1.6                      | -0.43 (-0.72, -0.14)         | 0.004   | 5.8 ± 1.4                               | 5.7 ± 1.5                      | 0.09 (-0.27, 0.45)           | 0.63    |
| <b>Binary outcomes</b>      |                                              |                                |                              |         |                                         |                                |                              |         |
| PTH >600 pg/mL              | 19%                                          | 42%                            | -15.0% (-26.4, -3.5)         | 0.01    | 32%                                     | 44%                            | -11.3% (-23.8, 1.2)          | 0.08    |
| Ca <8.4 mg/dL               | 21%                                          | 15%                            | 5.0% (-9.4, 16.8)            | 0.58    | 17%                                     | 13%                            | 7.2% (-1.6, 16.1)            | 0.11    |
| P >5.5 mg/dL                | 44%                                          | 56%                            | -9.1% (-18.5, 0.2)           | 0.06    | 55%                                     | 52%                            | 6.2% (-5.1, 17.6)            | 0.28    |

Crude mean ± std dev and prevalence (%) shown; Linear mixed models with random facility intercept adjusted for HD facility characteristics (dialysis organization size, facility size, facility % Black race, hospital-based, facility % total calcimimetic use) and patient characteristics (age, sex, Black race, dialysis vintage, BMI, serum albumin, hemoglobin, serum potassium, 13 summary comorbidities, catheter use). PTH=parathyroid hormone; Ca=calcium; P=phosphorus.

Table S4

MBD marker outcomes in US HD facilities that switched to Etelcalcetide-first vs. remained Cinacalcet-first: Approach 2 results by level of adjustment

|                            | Model 1               |        | Model 2              |        | Model 3              |        | Model 4              |        |
|----------------------------|-----------------------|--------|----------------------|--------|----------------------|--------|----------------------|--------|
|                            | Estimate (95% CI)     | p-val  | Estimate (95% CI)    | p-val  | Estimate (95% CI)    | p-val  | Estimate (95% CI)    | p-val  |
| <b>Continuous outcomes</b> |                       |        |                      |        |                      |        |                      |        |
| PTH (pg/mL)                | -243 (-318, -169)     | <0.001 | -184 (-265, -102)    | <0.001 | -169 (-249, -90)     | <0.001 | -178 (-259, -96)     | <0.001 |
| Serum Ca (mg/dL)           | -0.22 (-0.28,-0.16)   | <0.001 | -0.12 (-0.20,-0.05)  | 0.17   | -0.10 (-0.20, -0.01) | 0.04   | -0.14 (-0.22,-0.06)  | 0.34   |
| Serum P (mg/dL)            | -0.07 (-0.28, 0.15)   | 0.55   | -0.04 (-0.27, 0.20)  | 0.76   | 0.04 (-0.17, 0.25)   | 0.71   | 0.07 (-0.15, 0.29)   | 0.54   |
| <b>Binary outcomes</b>     |                       |        |                      |        |                      |        |                      |        |
| PTH >600 pg/mL             | -22.3% (-29.5, -15.2) | <0.001 | -15.5% (-23.2, -7.8) | <0.001 | -14.4% (-22.0, -6.8) | <0.001 | -14.5% (-22.4, -6.7) | <0.001 |
| Ca <8.4 mg/dL              | 6.1% (0.7, 11.4)      | 0.03   | 4.1% (-1.7, 10.0)    | 0.16   | 5.5% (-0.2, 11.3)    | 0.06   | 3.8% (-2.1, 9.8)     | 0.21   |
| P >5.5 mg/dL               | -6.0% (-13.8, 1.8)    | 0.13   | -4.2% (-12.3, 4.0)   | 0.32   | -1.9% (-9.6, 5.8)    | 0.62   | -1.5% (-9.4, 6.4)    | 0.70   |

Difference-in-differences (95% CI) shown with progressive covariate adjustment; Continuous outcomes show mean difference in outcome labs by period (after minus before); Binary outcomes show prevalence (%) difference in outcome labs being out of target by period (after minus before). Linear mixed models with a random facility intercept were fit combining all facilities (Etelcalcetide-first and Cinacalcet-first) to estimate the interaction effect between period and facility calcimimetic preference. For the binary outcomes, these linear models are so-called "linear probability models". Progressive fixed effect adjustments were as follows:

Model 1: Period (when estimating the period effect separately by facility preference) OR period, facility preference, and their interaction

*Karaboyas et al, Kidney Med, "Etelcalcetide Versus Cinacalcet in Hemodialysis Patients in the United States: A Facility Calcimimetic Approach to Assess Real-World Effectiveness"*

Model 2: Model 1 + facility-level characteristics (dialysis organization size, facility size, facility % Black race, hospital-based, facility % total calcimimetic use)

Model 3 (Primary analysis): Model 2 + patient-level case-mix (age, sex, Black race, dialysis vintage, BMI, serum albumin, hemoglobin, serum potassium, 13 summary comorbidities, catheter use)

Model 4 (Possible mediators): Model 3 + facility-level MBD treatments (facility % vitamin D use, facility % phosphate binder [calcium-based] use, facility % phosphate binder [non-calcium-based] use, facility mean dialysate calcium)
